# Supplementary material for: Howl variation across Himalayan, North African, Indian, and Holarctic wolf clades: tracing divergence in the world’s oldest wolf lineages using acoustics
Source: Oxford University Press journal article supplement (doi:10.1093/cz/zox001), 2017-02-17
Supplement: zox001_supp.pdf [file zox001_supp.pdf]

## Supplemental Materials

**Table S1.** Acoustic parameters summary for each wolf subspecies

| Subspecies            | Variables | Meanf        | Maxf         | Minf         | Range       | Endf         | Duration   | Cofv        | Posmax     | Posmin      |
|-----------------------|-----------|--------------|--------------|--------------|-------------|--------------|------------|-------------|------------|-------------|
| Himalayan wolf        | Range     | 228.8-981.9  | 245.4-1145.8 | 144.4-978.3  | 5.50-678.3  | 147.7-1105.7 | 0.52-7.90  | 0.35-32.02  | 0-1.00     | 0-1.00      |
|                       | Mean      | 428.5        | 465.4        | 369.5        | 101.8       | 404.5        | 2.56       | 6.22        | 0.33       | 0.53        |
|                       | SE        | 125.7        | 141.9        | 126.3        | 107.1       | 141.9        | 1.68       | 5.97        | 0.28       | 0.45        |
| North African wolf    | Range     | 424.2-856.0  | 476.1-1461.9 | 242.3-661.4  | 120.1-929.9 | 242.3-661.4  | 1.03-5.99  | 10.80-27.47 | 0-0.59     | 0-1.00      |
|                       | Mean      | 725.9        | 963.4        | 485.6        | 477.8       | 495.3        | 3.26       | 18.68       | 0.073      | 0.89        |
|                       | SE        | 104.7        | 187.6        | 109.4        | 150.2       | 110.8        | 1.55       | 5.45        | 0.11       | 0.30        |
| Indian wolf           | Range     | 323.0-1503.4 | 366.1-1604.2 | 107.7-1367.4 | 21.5-1013.6 | 107.7-1496.6 | 0.61-12.43 | 0.67-31.56  | 0.006-1.00 | 0.0063-1.00 |
|                       | Mean      | 593.5        | 692.0        | 496.9        | 197.1       | 572.5        | 2.71       | 8.96        | 0.38       | 0.57        |
|                       | SE        | 211.4        | 243.3        | 202.6        | 137.4       | 225.8        | 2.11       | 4.87        | 0.33       | 0.38        |
| Arctic wolf           | Range     | 418.8-751.8  | 478.8-858.2  | 240.0-490.0  | 126.0-587.3 | 273.8-698.8  | 1.43-6.83  | 10.10-31.61 | 0.00-1.00  | 0.00-1.00   |
|                       | Mean      | 541.6        | 707.67       | 318.2        | 389.5       | 401.6        | 4.60       | 21.11       | 0.28       | 0.27        |
|                       | SE        | 90.0         | 95.0         | 59.2         | 103.4       | 110.4        | 1.29       | 6.69        | 0.21       | 0.45        |
| European wolf         | Range     | 218.8-628.5  | 252.7-747.4  | 125.5-455.7  | 45.4-500.7  | 159.5-617.3  | 1.78-15.12 | 3.12-30.68  | 0.00-0.98  | 0.00-1.00   |
|                       | Mean      | 418.7        | 520.7        | 294.7        | 225.9       | 343.4        | 5.85       | 13.69       | 0.27       | 0.58        |
|                       | SE        | 109.1        | 125.8        | 72.7         | 99.7        | 102.2        | 2.72       | 5.97        | 0.31       | 0.47        |
| Iberian wolf          | Range     | 272.9-722.9  | 296.0-1116.0 | 92-638.0     | 64.0-777.0  | 92.0-706.0   | 1.10-12.80 | 2.03-44.63  | 0.00-0.99  | 0.00-1.00   |
|                       | Mean      | 438.2        | 586.1        | 280.7        | 305.7       | 308.5        | 6.55       | 18.66       | 0.16       | 0.81        |
|                       | SE        | 96.3         | 151.7        | 87.4         | 136.3       | 105.1        | 2.34       | 7.97        | 0.21       | 0.35        |
| Italian wolf          | Range     | 274.2-908.7  | 301.5-1356.6 | 193.8-646.0  | 21.5-1033.6 | 215.3-796.7  | 0.75-9.55  | 0.84-45.44  | 0.00-1.00  | 0.00-1.00   |
|                       | Mean      | 482.6        | 657.0        | 342.1        | 314.9       | 377.3        | 3.74       | 18.19       | 0.21       | 0.68        |
|                       | SE        | 131.0        | 223.3        | 80.4         | 200.5       | 108.7        | 1.89       | 10.09       | 0.24       | 0.39        |
| Israeli wolf          | Range     | 234.1-1236.6 | 291.5-1413.8 | 172.3-940.3  | 45.3-925.0  | 173.0-966.0  | 1.0-4.87   | 2.65-37.90  | 0.00-0.84  | 0.00-1.00   |
|                       | Mean      | 619.0        | 788.4        | 459.2        | 329.1       | 470.0        | 2.92       | 15.72       | 0.25       | 0.86        |
|                       | SE        | 227.6        | 279.0        | 190.6        | 177.6       | 190.0        | 1.11       | 7.17        | 0.23       | 0.30        |
| Mackenzie Valley Wolf | Range     | 254.3-661.5  | 280.5-840.8  | 147.1-551.5  | 38.1-506.8  | 147.1-551.5  | 1.40-15.44 | 2.24-30.16  | 0.00-0.86  | 0.00-1.00   |
|                       | Mean      | 492.5        | 567.1        | 356.3        | 210.8       | 374.1        | 4.14       | 10.77       | 0.24       | 0.73        |
|                       | SE        | 98.5         | 134.9        | 78.9         | 125.1       | 79.2         | 2.90       | 6.19        | 0.21       | 0.44        |
| Mexican wolf          | Range     | 380.6-577.3  | 399.8-796.2  | 202.6-410.3  | 38.1-496.7  | 202.6-418.3  | 3.74-10.20 | 1.35-27.44  | 0.020-0.71 | 0.00-1.00   |
|                       | Mean      | 429.5        | 528.8        | 335.6        | 193.2       | 363.8        | 7.64       | 11.61       | 0.14       | 0.55        |
|                       | SE        | 38.5         | 95.4         | 60.9         | 120.2       | 54.6         | 1.68       | 7.13        | 0.13       | 0.48        |

**Table S2:** Sources of wolf howls in the current study. Country where recorded refers to the place of origin for captive wolves and the location of recording session for wild wolves.

| Clade         | Wolf subspecies       | Scientific Classification                         | # of Individuals (# packs [captive:wild]) | Country where recorded | Number of howls | Sources                        |
|---------------|-----------------------|---------------------------------------------------|-------------------------------------------|------------------------|-----------------|--------------------------------|
| Himalayan     | Himalayan wolf        | <i>Canis lupus chanco-</i><br>Himalayan haplotype | ~15 (4 packs [2:2])                       | India                  | 301             | This study                     |
| North African | North African wolf    | <i>Canis lupus lupaster</i>                       | 4 packs [4:0]                             | Senegal                | 33              | Kershenbaum <i>et al.</i> 2016 |
| Indian        | Indian wolf           | <i>Canis lupus pallipes</i>                       | ~10 (4 packs [0:4])                       | India                  | 117             | This study                     |
| Holarctic     | Arctic wolf           | <i>Canis lupus arctos</i>                         | ~12 (7 packs [1:6])                       | Canada                 | 26              | Kershenbaum <i>et al.</i> 2016 |
|               | European wolf         | <i>Canis lupus lupus</i>                          | ~20 packs [7:13]                          | Poland, Russia, Greece | 65              | Kershenbaum <i>et al.</i> 2016 |
|               | Iberian wolf          | <i>Canis lupus signatus</i>                       | 11 (1 pack [1:0])                         | Spain                  | 176             | Palacios <i>et al.</i> 2007    |
|               | Italian wolf          | <i>Canis lupus italicus</i>                       | 7 packs [0:7]                             | Italy                  | 164             | Passilongo <i>et al.</i> 2010  |
|               | Israeli wolf          | <i>Canis lupus arabs</i>                          | 5(1[1:0])                                 | Israel                 | 30              | Kershenbaum <i>et al.</i> 2016 |
|               | Mackenzie Valley Wolf | <i>Canis lupus occidentalis</i>                   | 9 packs [7:2]                             | Canada                 | 127             | Kershenbaum <i>et al.</i> 2016 |
|               | Mexican wolf          | <i>Canis lupus baileyi</i>                        | 2 packs [1:1]                             | U.S.A                  | 31              | Kershenbaum <i>et al.</i> 2016 |

**Table S3.** Descriptions of each howl acoustic parameter.

| Howl acoustic parameter            | Abbreviation | Description                                                                                                                                                                                                                                                               |
|------------------------------------|--------------|---------------------------------------------------------------------------------------------------------------------------------------------------------------------------------------------------------------------------------------------------------------------------|
| Mean frequency                     | Meanf        | Mean of the fundamental frequency calculated every 0.05 seconds (Hz) for Himalayan, Indian, Iberian, and Italian wolves. For the other wolf subspecies, Meanf was calculated by averaging 50 measurements for each howl, ranging from every 0.02 seconds to 0.31 seconds. |
| Maximum frequency                  | Maxf         | Maximum frequency of the fundamental one (Hz)                                                                                                                                                                                                                             |
| Minimum frequency                  | Minf         | Minimum frequency of the fundamental one (Hz)                                                                                                                                                                                                                             |
| End frequency                      | Endf         | Frequency at the end of the fundamental one (Hz)                                                                                                                                                                                                                          |
| Duration                           | Duration     | 0.13                                                                                                                                                                                                                                                                      |
| Range                              | Range        | Difference between maximum and minimum frequencies (Hz)                                                                                                                                                                                                                   |
| Coefficient of frequency variation | cofv         | $[(SD/Meanf) * 100]$                                                                                                                                                                                                                                                      |
| Position of maximum frequency      | Posmax       | Position at which the maximum frequency occurs (time of Maxf/Duration) in the howl                                                                                                                                                                                        |
| Position of minimum frequency      | Posmin       | Position at which the minimum frequency occurs (time of Minf/Duration) in the howl                                                                                                                                                                                        |

**Table S4-S12.** Acoustic parameter comparisons across all wolf subspecies using a post-hoc Kruskal-Wallis one-way analysis of variance under Dunn’s tests with Bonferroni p-value adjustments. Each subspecies was treated as an independent unit. Bolded values indicate p-values below 0.01.

**Table S4.** Mean frequency

|                  | Himalayan       | North African   | Indian          | Arctic          | European        | Iberian         | Mackenzie Valley | Israeli         | Italian         | Mexican         |
|------------------|-----------------|-----------------|-----------------|-----------------|-----------------|-----------------|------------------|-----------------|-----------------|-----------------|
| Himalayan        |                 | <b>&lt;0.01</b> | <b>&lt;0.01</b> | <b>&lt;0.01</b> | 1.00            | 0.24            | <b>&lt;0.01</b>  | <b>&lt;0.01</b> | <b>&lt;0.01</b> | 1.00            |
| North African    | <b>&lt;0.01</b> |                 | <b>&lt;0.01</b> | 0.14            | <b>&lt;0.01</b> | <b>&lt;0.01</b> | <b>&lt;0.01</b>  | 0.19            | <b>&lt;0.01</b> | <b>&lt;0.01</b> |
| Indian           | <b>&lt;0.01</b> | <b>&lt;0.01</b> |                 | 1.00            | <b>&lt;0.01</b> | <b>&lt;0.01</b> | 0.19             | 1.00            | <b>&lt;0.01</b> | <b>&lt;0.01</b> |
| Arctic           | <b>&lt;0.01</b> | 0.43            | 1.00            |                 | <b>&lt;0.01</b> | <b>&lt;0.01</b> | 0.60             | 1.00            | 0.084           | 0.018           |
| European         | 1.00            | <b>&lt;0.01</b> | <b>&lt;0.01</b> | <b>&lt;0.01</b> |                 | 1.00            | <b>&lt;0.01</b>  | <b>&lt;0.01</b> | 0.018           | 1.00            |
| Iberian          | 0.24            | <b>&lt;0.01</b> | <b>&lt;0.01</b> | <b>&lt;0.01</b> | 1.00            |                 | <b>&lt;0.01</b>  | <b>&lt;0.01</b> | 0.051           | 1.00            |
| Mackenzie Valley | <b>&lt;0.01</b> | <b>&lt;0.01</b> | 0.19            | 0.60            | <b>&lt;0.01</b> | <b>&lt;0.01</b> |                  | 0.24            | 1.00            | 0.24            |
| Israeli          | <b>&lt;0.01</b> | 0.19            | 1.00            | 1.00            | <b>&lt;0.01</b> | <b>&lt;0.01</b> | 0.24             |                 | 0.018           | <b>&lt;0.01</b> |
| Italian          | <b>&lt;0.01</b> | <b>&lt;0.01</b> | <b>&lt;0.01</b> | 0.084           | 0.018           | 0.051           | 1.00             | 0.018           |                 | 1.00            |
| Mexican          | 1.00            | <b>&lt;0.01</b> | <b>&lt;0.01</b> | 0.018           | 1.00            | 1.00            | 0.24             | <b>&lt;0.01</b> | 1.00            |                 |

**Table S5.** Maximum frequency

|                  | Himalayan       | North African   | Indian          | Arctic          | European        | Iberian         | Mackenzie Valley | Israeli         | Italian         | Mexican         |
|------------------|-----------------|-----------------|-----------------|-----------------|-----------------|-----------------|------------------|-----------------|-----------------|-----------------|
| Himalayan        |                 | <b>&lt;0.01</b> | <b>&lt;0.01</b> | <b>&lt;0.01</b> | <b>&lt;0.01</b> | <b>&lt;0.01</b> | <b>&lt;0.01</b>  | <b>&lt;0.01</b> | <b>&lt;0.01</b> | 0.046           |
| North African    | <b>&lt;0.01</b> |                 | <b>&lt;0.01</b> | 0.39            | <b>&lt;0.01</b> | <b>&lt;0.01</b> | <b>&lt;0.01</b>  | 0.22            | <b>&lt;0.01</b> | <b>&lt;0.01</b> |
| Indian           | <b>&lt;0.01</b> | <b>&lt;0.01</b> |                 | 0.72            | <b>&lt;0.01</b> | 0.052           | 0.016            | 0.88            | 1.00            | 0.031           |
| Arctic           | <b>&lt;0.01</b> | 0.39            | 0.72            |                 | <b>&lt;0.01</b> | 0.011           | <b>&lt;0.01</b>  | 1.00            | 0.21            | <b>&lt;0.01</b> |
| European         | <b>&lt;0.01</b> | <b>&lt;0.01</b> | <b>&lt;0.01</b> | <b>&lt;0.01</b> |                 | 0.28            | 0.75             | <b>&lt;0.01</b> | <b>&lt;0.01</b> | 1.00            |
| Iberian          | <b>&lt;0.01</b> | <b>&lt;0.01</b> | <b>&lt;0.01</b> | 0.011           | 0.28            |                 | 1.00             | 0.016           | 0.52            | 0.89            |
| Mackenzie Valley | <b>&lt;0.01</b> | <b>&lt;0.01</b> | 0.016           | <b>&lt;0.01</b> | 0.75            | 1.00            |                  | <b>&lt;0.01</b> | 0.22            | 1.00            |
| Israeli          | <b>&lt;0.01</b> | 0.22            | 0.88            | 1.00            | <b>&lt;0.01</b> | 0.016           | <b>&lt;0.01</b>  |                 | 0.28            | <b>&lt;0.01</b> |
| Italian          | <b>&lt;0.01</b> | <b>&lt;0.01</b> | 1.00            | 0.21            | <b>&lt;0.01</b> | 0.52            | 0.22             | 0.28            |                 | 0.20            |
| Mexican          | 0.046           | <b>&lt;0.01</b> | <b>0.031</b>    | <b>&lt;0.01</b> | 1.00            | 0.88            | 1.00             | <b>&lt;0.01</b> | 0.20            |                 |

**Table S6.** Minimum frequency

|                  | Himalayan | North African | Indian | Arctic | European | Iberian | Mackenzie Valley | Israeli | Italian | Mexican     |
|------------------|-----------|---------------|--------|--------|----------|---------|------------------|---------|---------|-------------|
| Himalayan        |           | <0.01         | <0.01  | 0.38   | <0.01    | <0.01   | 1.00             | 0.10    | 1.00    | 1.00        |
| North African    | <0.01     |               | 1.00   | <0.01  | <0.01    | <0.01   | <0.01            | 1.00    | <0.01   | <0.01       |
| Indian           | <0.01     | 1.00          |        | 1.00   | <0.01    | <0.01   | <0.01            | 1.00    | <0.01   | <0.01       |
| Arctic           | 0.38      | <0.01         | <0.01  |        | 1.00     | 1.00    | 0.25             | <0.01   | 1.00    | 1.00        |
| European         | <0.01     | <0.01         | <0.01  | 1.00   |          | 1.00    | <0.01            | <0.01   | 0.017   | 0.27        |
| Iberian          | <0.01     | <0.01         | <0.01  | <0.01  | 1.00     |         | <0.01            | <0.01   | <0.01   | <0.01       |
| Mackenzie Valley | 1.00      | <0.01         | <0.01  | 0.25   | <0.01    | <0.01   |                  | 0.35    | 0.97    | 1.00        |
| Israeli          | 0.10      | 1.00          | 1.00   | <0.01  | <0.01    | <0.01   | 0.35             |         | 0.013   | <b>0.22</b> |
| Italian          | 1.00      | <0.01         | <0.01  | 1.00   | 0.016    | <0.01   | 0.97             | 0.013   |         | 1.00        |
| Mexican          | 1.00      | <0.01         | <0.01  | 1.00   | 0.27     | <0.01   | 1.00             | 0.22    | 1.00    |             |

**Table S7.** End Frequency

|                  | Himalayan | North African | Indian | Arctic | European | Iberian | Mackenzie Valley | Israeli | Italian | Mexican |
|------------------|-----------|---------------|--------|--------|----------|---------|------------------|---------|---------|---------|
| Himalayan        |           | <0.01         | <0.01  | 1.00   | 0.037    | <0.01   | 1.00             | 0.84    | 1.00    | 1.00    |
| North African    | <0.01     |               | 1.00   | 0.063  | <0.01    | <0.01   | <0.01            | 1.00    | <0.01   | 0.011   |
| Indian           | <0.01     | 1.00          |        | <0.01  | <0.01    | <0.01   | <0.01            | 0.31    | <0.01   | <0.01   |
| Arctic           | 1.00      | 0.063         | <0.01  |        | 0.96     | <0.01   | 1.00             | 1.00    | 1.00    | 1.00    |
| European         | 0.037     | <0.01         | <0.01  | 0.96   |          | 0.58    | 0.31             | <0.01   | 1.00    | 1.00    |
| Iberian          | <0.01     | <0.01         | <0.01  | <0.01  | 0.58     |         | <0.01            | <0.01   | <0.01   | 0.018   |
| Mackenzie Valley | 1.00      | <0.01         | <0.01  | 1.00   | 0.31     | <0.01   |                  | 0.58    | 1.00    | 1.00    |
| Israeli          | 0.84      | 1.00          | 0.31   | 1.00   | <0.01    | <0.01   | 0.58             |         | 0.13    | 1.00    |
| Italian          | 1.00      | <0.01         | <0.01  | 1.00   | 1.00     | <0.01   | 1.00             | 0.13    |         | 1.00    |
| Mexican          | 1.00      | 0.011         | <0.01  | 1.00   | 1.00     | 0.018   | 1.00             | 1.00    | 1.00    |         |

**Table S8.** Duration

|                  | Himalayan | North African | Indian | Arctic | European | Iberian | Mackenzie Valley | Israeli | Italian | Mexican |
|------------------|-----------|---------------|--------|--------|----------|---------|------------------|---------|---------|---------|
| Himalayan        |           | 0.52          | 1.00   | <0.01  | <0.01    | <0.01   | <0.01            | 1.00    | <0.01   | <0.01   |
| North African    | 0.52      |               | 0.72   | 0.21   | <0.01    | <0.01   | 1.00             | 1.00    | 1.00    | <0.01   |
| Indian           | 1.00      | 0.72          |        | <0.01  | <0.01    | <0.01   | <0.01            | 1.00    | <0.01   | <0.01   |
| Arctic           | <0.01     | 0.21          | <0.01  |        | 1.00     | 0.25    | 0.72             | 0.055   | 0.41    | 0.030   |
| European         | <0.01     | <0.01         | <0.01  | 1.00   |          | 1.00    | <0.01            | <0.01   | <0.01   | 0.19    |
| Iberian          | <0.01     | <0.01         | <0.01  | 0.25   | 1.00     |         | <0.01            | <0.01   | <0.01   | 0.95    |
| Mackenzie Valley | <0.01     | 1.00          | <0.01  | 0.72   | <0.01    | <0.01   |                  | 0.72    | 1.00    | <0.01   |
| Israeli          | 1.00      | 1.00          | 1.00   | 0.055  | <0.01    | <0.01   | 0.72             |         | 0.96    | <0.01   |
| Italian          | <0.01     | 1.00          | <0.01  | 0.41   | <0.01    | <0.01   | 1.00             | 0.96    |         | <0.01   |
| Mexican          | <0.01     | <0.01         | <0.01  | 0.030  | 0.19     | 0.95    | <0.01            | <0.01   | <0.01   |         |

**Table S9.** Range

|                  | Himalayan | North African | Indian | Arctic | European | Iberian | Mackenzie Valley | Israeli | Italian | Mexican |
|------------------|-----------|---------------|--------|--------|----------|---------|------------------|---------|---------|---------|
| Himalayan        |           | <0.01         | <0.01  | <0.01  | <0.01    | <0.01   | <0.01            | <0.01   | <0.01   | <0.01   |
| North African    | <0.01     |               | <0.01  | 1.00   | <0.01    | <0.01   | <0.01            | 0.14    | <0.01   | <0.01   |
| Indian           | <0.01     | <0.01         |        | <0.01  | 0.76     | <0.01   | 1.00             | <0.01   | <0.01   | 1.00    |
| Arctic           | <0.01     | 1.00          | <0.01  |        | <0.01    | 0.32    | <0.01            | 1.00    | 0.068   | <0.01   |
| European         | <0.01     | <0.01         | 0.76   | <0.01  |          | 0.051   | 1.00             | 0.41    | 0.44    | 1.00    |
| Iberian          | <0.01     | <0.01         | <0.01  | 0.32   | 0.051    |         | <0.01            | 1.00    | 1.00    | <0.01   |
| Mackenzie Valley | <0.01     | <0.01         | 1.00   | <0.01  | 1.00     | <0.01   |                  | 0.031   | <0.01   | 1.00    |
| Israeli          | <0.01     | 0.14          | <0.01  | 1.00   | 0.41     | 1.00    | 0.031            |         | 1.00    | 0.046   |
| Italian          | <0.01     | <0.01         | <0.01  | 0.68   | 0.44     | 1.00    | <0.01            | 1.00    |         | 0.039   |
| Mexican          | <0.01     | <0.01         | 1.00   | <0.01  | 1.00     | <0.01   | 1.00             | 0.046   | 0.039   |         |

**Table S10.** Coefficient of frequency variation (covf)

|                  | Himalayan | North African | Indian | Arctic | European | Iberian | Mackenzie Valley | Israeli | Italian | Mexican |
|------------------|-----------|---------------|--------|--------|----------|---------|------------------|---------|---------|---------|
| Himalayan        |           | <0.01         | <0.01  | <0.01  | <0.01    | <0.01   | <0.01            | <0.01   | <0.01   | <0.01   |
| North African    | <0.01     |               | <0.01  | 1.00   | 0.18     | 1.00    | <0.01            | 1.00    | 1.00    | 0.011   |
| Indian           | <0.01     | <0.01         |        | <0.01  | <0.01    | <0.01   | 1.00             | <0.01   | <0.01   | 1.00    |
| Arctic           | <0.01     | 1.00          | <0.01  |        | 0.038    | 1.00    | <0.01            | 0.72    | 0.72    | <0.01   |
| European         | <0.01     | 0.18          | <0.01  | 0.038  |          | 0.034   | 0.20             | 1.00    | 0.56    | 1.00    |
| Iberian          | <0.01     | 1.00          | <0.01  | 1.00   | 0.034    |         | <0.01            | 1.00    | 1.00    | <0.01   |
| Mackenzie Valley | <0.01     | <0.01         | 1.00   | <0.01  | 0.20     | <0.01   |                  | 0.085   | <0.01   | 1.00    |
| Israeli          | <0.01     | 1.00          | <0.01  | 0.72   | 1.00     | 1.00    | 0.085            |         | 1.00    | 0.72    |
| Italian          | <0.01     | 1.00          | <0.01  | 0.72   | 0.56     | 1.00    | <0.01            | 1.00    |         | 0.028   |
| Mexican          | <0.01     | 0.011         | 1.00   | <0.01  | 1.00     | <0.01   | 1.00             | 0.72    | 0.028   |         |

**Table S11.** Position of maximum frequency (posmax)

|                  | Himalayan | North African | Indian | Arctic | European | Iberian | Mackenzie Valley | Israeli | Italian | Mexican |
|------------------|-----------|---------------|--------|--------|----------|---------|------------------|---------|---------|---------|
| Himalayan        |           | <0.01         | 1.00   | 1.00   | 0.047    | <0.01   | 0.16             | 1.00    | <0.01   | 0.084   |
| North African    | <0.01     |               | <0.01  | <0.01  | 0.052    | 0.56    | <0.01            | <0.01   | 0.036   | 0.68    |
| Indian           | 1.00      | <0.01         |        | 1.00   | 0.37     | <0.01   | 1.00             | 1.00    | 0.015   | 0.32    |
| Arctic           | 1.00      | <0.01         | 1.00   |        | 0.68     | 0.015   | 1.00             | 1.00    | 0.25    | 0.44    |
| European         | 0.68      | 0.18          | 0.37   | 0.68   |          | 1.00    | 1.00             | 1.00    | 1.00    | 1.00    |
| Iberian          | 0.015     | 0.56          | <0.01  | 0.015  | 1.00     |         | 0.033            | 0.24    | 1.00    | 1.00    |
| Mackenzie Valley | 1.00      | <0.01         | 1.00   | 1.00   | 1.00     | 0.033   |                  | 1.00    | 1.00    | 1.00    |
| Israeli          | 1.00      | <0.01         | 1.00   | 1.00   | 1.00     | 0.24    | 1.00             |         | 1.00    | 1.00    |
| Italian          | 0.25      | 0.036         | 0.015  | 0.25   | 1.00     | 1.00    | 1.00             | 1.00    |         | 1.00    |
| Mexican          | 0.44      | 0.67          | 0.32   | 0.44   | 1.00     | 1.00    | 1.00             | 1.00    | 1.00    |         |

**Table S12.** Position of minimum frequency (posmin)

|                  | Himalayan | North African | Indian | Arctic | European | Iberian | Mackenzie Valley | Israeli | Italian | Mexican |
|------------------|-----------|---------------|--------|--------|----------|---------|------------------|---------|---------|---------|
| Himalayan        |           | <0.01         | 1.00   | 0.25   | 1.00     | <0.01   | <0.01            | <0.01   | 1.00    | 1.00    |
| North African    | <0.01     |               | <0.01  | <0.01  | <0.01    | 0.030   | 0.22             | 1.00    | <0.01   | <0.01   |
| Indian           | 1.00      | <0.01         |        | 0.32   | 1.00     | <0.01   | <0.01            | <0.01   | 1.00    | 1.00    |
| Arctic           | 0.25      | <0.01         | 0.32   |        | 0.048    | <0.01   | <0.01            | <0.01   | 0.042   | 0.26    |
| European         | 1.00      | <0.01         | 1.00   | 0.048  |          | 0.88    | 0.22             | 0.21    | 1.00    | 1.00    |
| Iberian          | <0.01     | 0.030         | <0.01  | <0.01  | 0.88     |         | 1.00             | 1.00    | 0.053   | 1.00    |
| Mackenzie Valley | <0.01     | 0.22          | <0.01  | <0.01  | 0.22     | 1.00    |                  | 1.00    | <0.01   | 0.35    |
| Israeli          | <0.01     | 1.00          | <0.01  | <0.01  | 0.21     | 1.00    | 1.00             |         | 0.041   | 0.25    |
| Italian          | 1.00      | <0.01         | 1.00   | 0.042  | 1.00     | 0.053   | <0.01            | 0.040   |         | 1.00    |
| Mexican          | 1.00      | <0.01         | 1.00   | 0.26   | 1.00     | 1.00    | 0.35             | 0.25    | 1.00    |         |
